# Supplementary material for: SAXS and SANS characterization of gelable polystyrene-b-poly(acryloxy propyl triethoxysilane) (PS-b-PAPTES) diblock copolymer micelles before and after hydrolysis–condensation
Source: Royal Society of Chemistry journal article supplement (doi:10.1039/c2sm25412c), 2012-01-01
Supplement: c2sm25412c.pdf [file c2sm25412c.pdf]

## Electronic Supplementary Information

# Characterization of gelable PS-PAPTES diblock copolymer micelles before and after hydrolysis-condensation by SAXS and SANS

Cé Guinto Gamys<sup>a</sup>, Emmanuel Beyou<sup>a\*</sup>, Elodie Bourgeat-Lami<sup>b</sup>, Laurent David<sup>a</sup>, Julian Oberdisse<sup>c,d</sup>

<sup>a</sup> Université de Lyon, Lyon, F-69003, France, Université Lyon 1, Lyon, F-69003, France, CNRS UMR5223, Ingénierie des Matériaux Polymères IMP@Lyon1, 15 boulevard Latarjet, F-69622 Villeurbanne, France  
\*Email : beyou@univ-lyon1.fr

<sup>b</sup> Université de Lyon, Université Lyon 1, CPE Lyon, CNRS, UMR 5265, Laboratoire de Chimie Catalyse Polymères et Procédés (C2P2), LCPP group, 43, Bd. du 11 Novembre 1918, F-69616 Villeurbanne, France

<sup>c</sup> Université Montpellier 2/CNRS, Laboratoire Charles Coulomb UMR 5221, F-34095 Montpellier, France

<sup>d</sup> Laboratoire Léon Brillouin, UMR 12 CEA/CNRS, CEA Saclay, F-91191 Gif sur Yvette, France

## Synthesis of PS and PAPTES-based diblock copolymers

PAPTES and PS homopolymers were used as macroinitiators for the synthesis of diblock copolymers by Nitroxide Mediated Polymerization as described in previous studies<sup>1-2</sup> (Scheme S1).

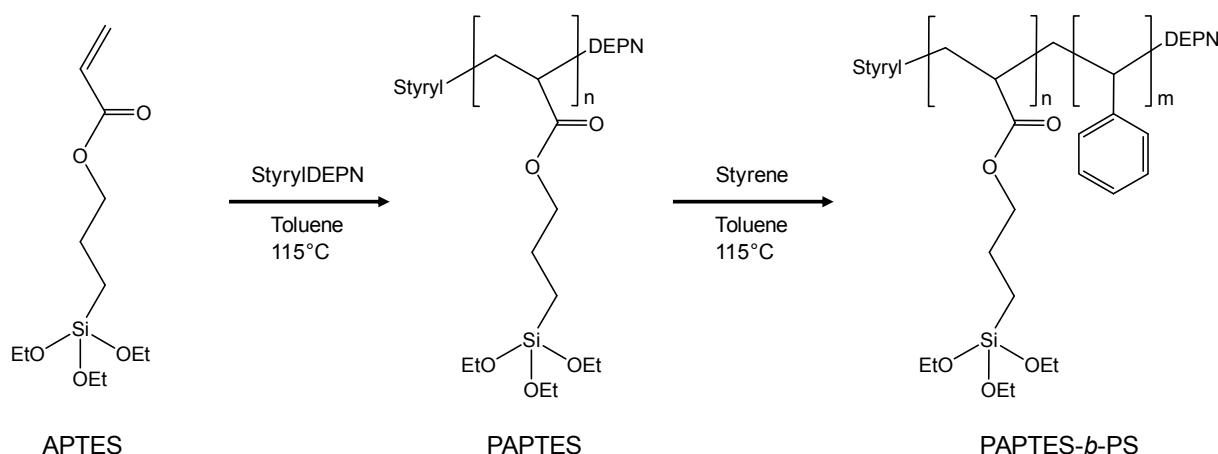

**Scheme S1:** Synthesis of PAPTES-PS block copolymers by NMP from PAPTES-DEPN macroinitiator

Using this procedure, well-defined PAPTES-b-PS and PS-b-PAPTES diblock copolymers with various chain lengths and compositions were successfully obtained from PAPTES<sub>91</sub>-DEPN, PAPTES<sub>113</sub>-DEPN and PS<sub>272</sub>-DEPN macroinitiators, respectively (**Table S1**).

**Table S1:** Molecular parameters of a series of PS-PAPTES diblock copolymers obtained by NMP at 115°C using respectively PAPTES<sub>91</sub>-DEPN, PAPTES<sub>113</sub> - DEPN and PS<sub>272</sub>-DEPN as macroinitiators. Detailed polymerization conditions are available in the literature<sup>1-2</sup>.

| Sample                                   | Time (h) | Conversion <sup>a</sup> (%) | M <sub>n,theo</sub> <sup>b</sup> (g.mol <sup>-1</sup> ) | M <sub>n,SEC</sub> (g.mol <sup>-1</sup> ) | M <sub>w</sub> /M <sub>n</sub> | dn/dc <sup>c</sup> (mL.g <sup>-1</sup> ) |
|------------------------------------------|----------|-----------------------------|---------------------------------------------------------|-------------------------------------------|--------------------------------|------------------------------------------|
| PAPTES <sub>91</sub> -PS <sub>34</sub>   | 0.25     | 4.3                         | 28740                                                   | 31070                                     | 1.44                           | 0.065                                    |
| PAPTES <sub>91</sub> -PS <sub>175</sub>  | 1        | 21.9                        | 43380                                                   | 45830                                     | 1.37                           | 0.110                                    |
| PAPTES <sub>91</sub> -PS <sub>317</sub>  | 2.5      | 39.6                        | 58110                                                   | 57250                                     | 1.40                           | 0.130                                    |
| PAPTES <sub>113</sub> -PS <sub>489</sub> | 10       | 61.1                        | 82050                                                   | 84940                                     | 1.33                           | 0.122                                    |
| PS <sub>272</sub> -PAPTES <sub>130</sub> | 16       | 26.1                        | 64300                                                   | 59990                                     | 1.18                           | 0.100                                    |
| PS <sub>272</sub> -PAPTES <sub>224</sub> | 32       | 44.9                        | 90250                                                   | 83310                                     | 1.21                           | 0.077                                    |
| PS <sub>272</sub> -PAPTES <sub>290</sub> | 64       | 58.1                        | 108470                                                  | 101250                                    | 1.30                           | 0.064                                    |
| PS <sub>272</sub> -PAPTES <sub>336</sub> | 128      | 67.2                        | 121000                                                  | 110800                                    | 1.32                           | 0.056                                    |

<sup>a</sup>Calculated by <sup>1</sup>H NMR. <sup>b</sup>M<sub>n,theo</sub> = [M]<sub>0</sub>/[I]<sub>0</sub> x Conversion x M(monomer). <sup>c</sup>Determined by interferometric refractometry.

## References

- 1 Gamys CG.; Beyou, E. and Bourgeat-Lami, E., *J. Polym. Sci., PartA : Polym. Chem.*, 2010, **48**, 784.
- 2 Gamys CG.; Beyou, E.; Bourgeat-Lami, E., David, L. and Alcouffe, P. *J. Polym. Sci., PartA : Polym. Chem.*, 2011, **49**, 4193.
